# Supplementary material for: Fluorescence by 5-aminolevulinic acid-induced protoporphyrin Ⅸ varies in tumor and normal tissues during robot-assisted partial nephrectomy for renal cell carcinoma.
Source: Research Square preprint supplement (doi:10.21203/rs.3.rs-5627040/v1), 2025-03-31
Supplement: Supplementary file 1 [file 478ef2f341e88e0ae8cdc5ee.xlsx]

## Sheet: Table1
Table1. Patients characteristics and surgical outcomes
Number of patients			19
Median age (year, range)			61 (40-82)
Sex
male			14
female			5
Median tumor size (mm, range)			33 (13-50)
Median operation time (min, range)			166 (138-224)
Median console time (min, range)			101 (68-147)
Median warm ischemic time (min, range)			16.5 (7-34)
Median Blood loss (ml, range)			125 (0-400)
Median postoperative hospital stay (day)			7 (4-8)
Histopathology
Clear cell carcinoma			17
Chromophobe carcinoma			2
Complications
Liver dysfunction (Clavien 1)			4
Surgical site infection (Clavien 2)			1

## Sheet: Table2
Table2. Fluorescence in the tumor and normal tissues in 19 cases.
Case no.	Age	Sex	Tumor size (mm)	Pathology	Administration time of 5-ALA prior to skin incision (hour)	Camera system	Fluorescence of tumor during resection	Fluorescence of tumor in ex vivo (dark box)	Fluorescence of the normal tissue around the tumor in dark box
1	40	M	35	Clear cell carcinoma	6	Olympus	Negative	Negative	Negative
2	76	F	29	Clear cell carcinoma	6	Olympus	Negative	Negative	Negative
3	59	M	33	Clear cell carcinoma	6	Olympus	Negative	Negative	Negative
4	63	M	20	Clear cell carcinoma	0	Olympus	Negative	Negative	Negative
5	71	M	16	Clear cell carcinoma	0	Olympus	Negative	Negative	Negative
6	78	F	36	Clear cell carcinoma	0	Olympus	Negative	Negative	Negative
7	82	M	38	Clear cell carcinoma	12	Olympus	Negative	Negative	Negative
8	52	F	38	Clear cell carcinoma	9	KARL STORZ	Negative	Positive	Negative
9	67	M	22	Clear cell carcinoma	7	KARL STORZ	Negative	Negative	Negative
10	78	F	20	Clear cell carcinoma	9	KARL STORZ	Negative	Negative	Negative
11	58	M	30	Chromophobe carcinoma	0	KARL STORZ	Negative	Negative	Negative
12	61	F	26	Clear cell carcinoma	9	KARL STORZ	Negative	Negative	Negative
13	56	M	14	Clear cell carcinoma	9+0	KARL STORZ	Negative	Positive	Positive
14	57	M	35	Clear cell carcinoma	7	KARL STORZ	Negative	Positive	Positive
15	56	M	50	Clear cell carcinoma	9	KARL STORZ	Positive	Positive	Positive
16	61	M	13	Clear cell carcinoma	7	KARL STORZ	Negative	Positive	Negative
17	71	M	22	Clear cell carcinoma	9	KARL STORZ	Negative	Negative	Negative
18	76	M	40	Chromophobe carcinoma	6	KARL STORZ	Negative	Negative	Negative
19	57	M	35	Clear cell carcinoma	6	KARL STORZ	Negative	Negative	Positive
5-ALA:5-aminolevulinic acid

## Sheet: Table3
Table3. Concentrations of 5-ALA and PPⅨ in the normal and the tumor tissue of selected six cases
No.	Case	Tissues	Fluorescence	Administration time of 5-ALA prior to skin incision (hour)	Tissue
					5-ALA	PPIX
					[umol/g protein]	[nmol/g protein]
1	Case6	Normal	-	0	1.36027	1.33954
2		Tumor	-		0.570141	3.1291
3	Case8	Normal	-	7	0.355797	12.3033
4		Tumor	+		0.43528	37.2799
5	Case13	Normal	-	9 + 0	0.239064	23.5285
6		Normal	+		0.254218	18.8424
7		Tumor	+		0.128388	4.09724
8	Case14	Normal	-	7	1.1076	32.0411
9		Normal	+		1.28408	54.1235
10		Tumor	+		0.506918	39.4217
11	Case15	Normal	-	7	0.259383	6.54417
12		Normal	+		0.370902	22.2642
13		Tumor	-		0.518031	22.7975
14		Tumor	+		1.1552	66.728
15	Case16	Normal	-	7	0.135371	2.85505
16		Tumor	+		0.578422	41.1843
